# High Quality Topic Extraction from Business News Explains Abnormal Financial Market Volatility

Ryohei Hisano<sup>1,2\*</sup>, Didier Sornette<sup>1,3</sup>, Takayuki Mizuno<sup>2,4,5</sup>, Takaaki Ohnishi<sup>2,5</sup>, Tsutomu Watanabe<sup>2,5</sup>

**1** ETH Zurich, Department of Management, Technology and Economics, Zurich, Switzerland, **2** The Canon Institute for Global Studies, Tokyo, Japan, **3** Swiss Finance Institute, Zurich, Switzerland, **4** University of Tsukuba, Doctoral Program in Computer Science, Graduate School of Systems and Information Engineering, Ibaraki, Japan, **5** The University of Tokyo, Graduate School of Economics, Tokyo, Japan

## Abstract

Understanding the mutual relationships between information flows and social activity in society today is one of the cornerstones of the social sciences. In financial economics, the key issue in this regard is understanding and quantifying how news of all possible types (geopolitical, environmental, social, financial, economic, etc.) affects trading and the pricing of firms in organized stock markets. In this article, we seek to address this issue by performing an analysis of more than 24 million news records provided by Thompson Reuters and of their relationship with trading activity for 206 major stocks in the S&P US stock index. We show that the whole landscape of news that affects stock price movements can be automatically summarized via simple regularized regressions between trading activity and news information pieces decomposed, with the help of simple topic modeling techniques, into their “thematic” features. Using these methods, we are able to estimate and quantify the impacts of news on trading. We introduce network-based visualization techniques to represent the whole landscape of news information associated with a basket of stocks. The examination of the words that are representative of the topic distributions confirms that our method is able to extract the significant pieces of information influencing the stock market. Our results show that one of the most puzzling stylized facts in financial economics, namely that at certain times trading volumes appear to be “abnormally large,” can be partially explained by the flow of news. In this sense, our results prove that there is no “excess trading,” when restricting to times when news is genuinely novel and provides relevant financial information.

**Citation:** Hisano R, Sornette D, Mizuno T, Ohnishi T, Watanabe T (2013) High Quality Topic Extraction from Business News Explains Abnormal Financial Market Volatility. PLoS ONE 8(6): e64846. doi:10.1371/journal.pone.0064846

**Editor:** Sune Lehmann, Technical University of Denmark, Denmark

**Received:** December 7, 2012; **Accepted:** April 19, 2013; **Published:** June 6, 2013

**Copyright:** © 2013 Hisano et al. This is an open-access article distributed under the terms of the Creative Commons Attribution License, which permits unrestricted use, distribution, and reproduction in any medium, provided the original author and source are credited.

**Funding:** Ryohei Hisano is partially supported by funding from the Japanese Student Services Organization through a scholarship titled “Scholarship for Long-term Foreign Studies-2010.” Tsutomu Watanabe is supported by funding from JSPS Grant-in-Aid for Scientific Research (24223003). The funders had no role in study design, data collection and analysis, decision to publish, or preparation of the manuscript. No additional external funding was received for this study.

**Competing Interests:** The authors have declared that no competing interests exist.

\* E-mail: em072010@yahoo.co.jp

## Introduction

Neoclassical financial economics based on the “efficient market hypothesis” (EMH) considers price movements as almost perfect instantaneous reactions to information flows. Thus, according to the EMH, price changes simply reflect exogenous news. Such news - of all possible types (geopolitical, environmental, social, financial, economic, etc.) - lead investors to continuously reassess their expectations of the cash flows that firms’ investment projects could generate in the future. These reassessments are translated into readjusted demand/supply functions, which then push prices up or down, depending on the net imbalance between demand and supply, towards a fundamental value. As a consequence, observed prices are considered the best embodiments of the present value of future cash flows. In this view, market movements are purely exogenous without any internal feedback loops. In particular, the most extreme losses occurring during crashes are considered to be solely triggered exogenously.

The problem with this paradigm is that, in practice, relating actual price movements to particular news has been strikingly elusive. Many attempts to relate price changes to news, be it low frequency or high frequency, have failed to find convincing supportive evidence for the EMH [1–6]. Moreover, it has long

been recognized that prices move much too large an extent and trading volume is much too large compared with what would be predicted from the EMH [7–9]. This suggests that there is more to price dynamics than just the exogenous flow of information. Against this background, the concept of “reflexivity” has been introduced [10], which embodies the notion that past actions of investors also significantly influence present decisions so as to create feedback loops and significant endogenous dynamics [11]. The unresolved issue until now is then to disentangle exogenous and endogenous factors and understand which news are really important and how they are incorporated in prices. Given the a priori foundational nature of news flows on price formation in financial economics on the one hand and the absence of empirical support for it on the other hand, without such an understanding and the corresponding control that should derive from it, financial markets will remain vulnerable to the excess volatility, wild price swings, bubbles and crashes that have plagued them in recent years as well as over most of their history [12].

The present article represents an attempt to break the above stalemate by (i) using a huge database of business news gathered for institutional investors and (ii) introducing a new methodology to extract relevant news that influence trading activity. This new methodology allows us to remove in large part the endogenous

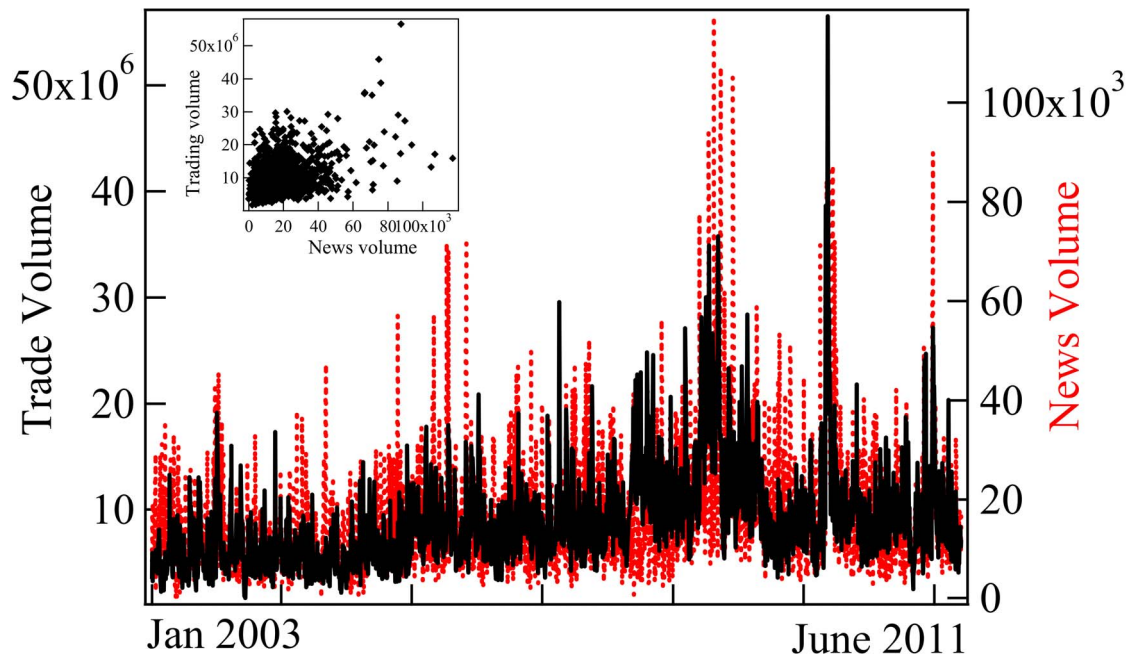

**Figure 1. Comparison between the time evolution of trading volume and aggregate news volume for Toyota.** Black continuous line plots trading volume and red dashed line plots aggregate news volume. The inset plots the trading volume as a function of the concomitant news volume.

doi:10.1371/journal.pone.0064846.g001

components of price dynamics and to identify a hierarchy of important news. Our approach differs in several important dimensions from the ones employed by previous studies investigating the impact of news on financial markets, such as [13–18]. One class of previous studies analyzed the information provided by news only in an aggregated manner without taking into account the specific information content. However, as casual observation indicates, each news record has different meaning to investors and thus different impact on prices, so that just counting the total number of news records for a particular period would not work well. Other previous studies only considered a small restricted set of news, such as earnings reports and the release of new economic data, and thus suffered from the serious limitation of neglecting the possible significant impact of other types of news arriving at the time. One way to circumvent the latter problem could be to use very short time intervals [19] so as to minimize attribution errors. But recent studies, including [20], have shown that the impact of news persists over days, weeks and sometimes months, making it difficult, if not impossible, to extract their influence by just using temporal partitioning.

We address all these problems by performing a simultaneous disaggregated estimation of the relevant news types with respect to financial trading activity. We mine raw texts of more than 24 million news records provided by Thomson Reuters and examine their impact on trading activity in stocks of the 206 firms listed in the S&P 500 US stock index for each of which there were more than 5,000 news records over the period from January 2003 to June 2011. To determine what pieces of information are the most relevant to explain trading activity of each stock, we use a combination of regularized regressions and topic modeling techniques. This allows us to compare quantitatively the relative importance of the different news. We show that nearly 30–40% of the top 5% most important events in terms of trading volume can be almost perfectly explained by our decoded news flow.

## Methods

The existence of a good correspondence between the time evolution of trading activity (measured by the daily trading volume) and the time evolution of news volume is well-known [13–15]. This correspondence is illustrated in Fig. 1, which shows the time evolution of the trading volume (the number of shares traded per day) of the Toyota stock and the evolution of the volume of news, measured as the number of words per day in text records that include the company name Toyota. Using just the number of news records (instead of the total number of words in these records) yields essentially the same results.

Starting from this rough aggregate correspondence, our much more ambitious goal is to disaggregate (a) the flow of news into relevant topics and their associated words and (b) the trading volume of individual stocks, in order to construct a complete network of interdependences. Fig. 2 provides a flowchart of our methodology, which consists of (i) decomposing the total flow of news into their thematic features by applying topic modeling techniques, (ii) estimating their impact on trading activity simultaneously in order to prune out the unimportant topics, and (iii) quantifying how many of the peaks in trading activity can be explained by news shocks.

Once a term (for instance Toyota) is chosen and the associated news records are collected (step (1)), the second step is to decompose news information pieces into their “thematic” features, as shown in Fig. 2. This is done by applying a simple topic modeling technique called Latent Dirichlet Allocation (LDA) [21,22]. Topic models are graphical models [23] which assume that shared global multinomial word distributions (i.e., topic distributions) govern the corpus. Word frequencies within a given document are created from a mixture of these global topic distributions. LDA is the simplest topic model and uses the Dirichlet prior in order to ensure sparsity in the underlying multinomial distribution. This makes learned topics easier to

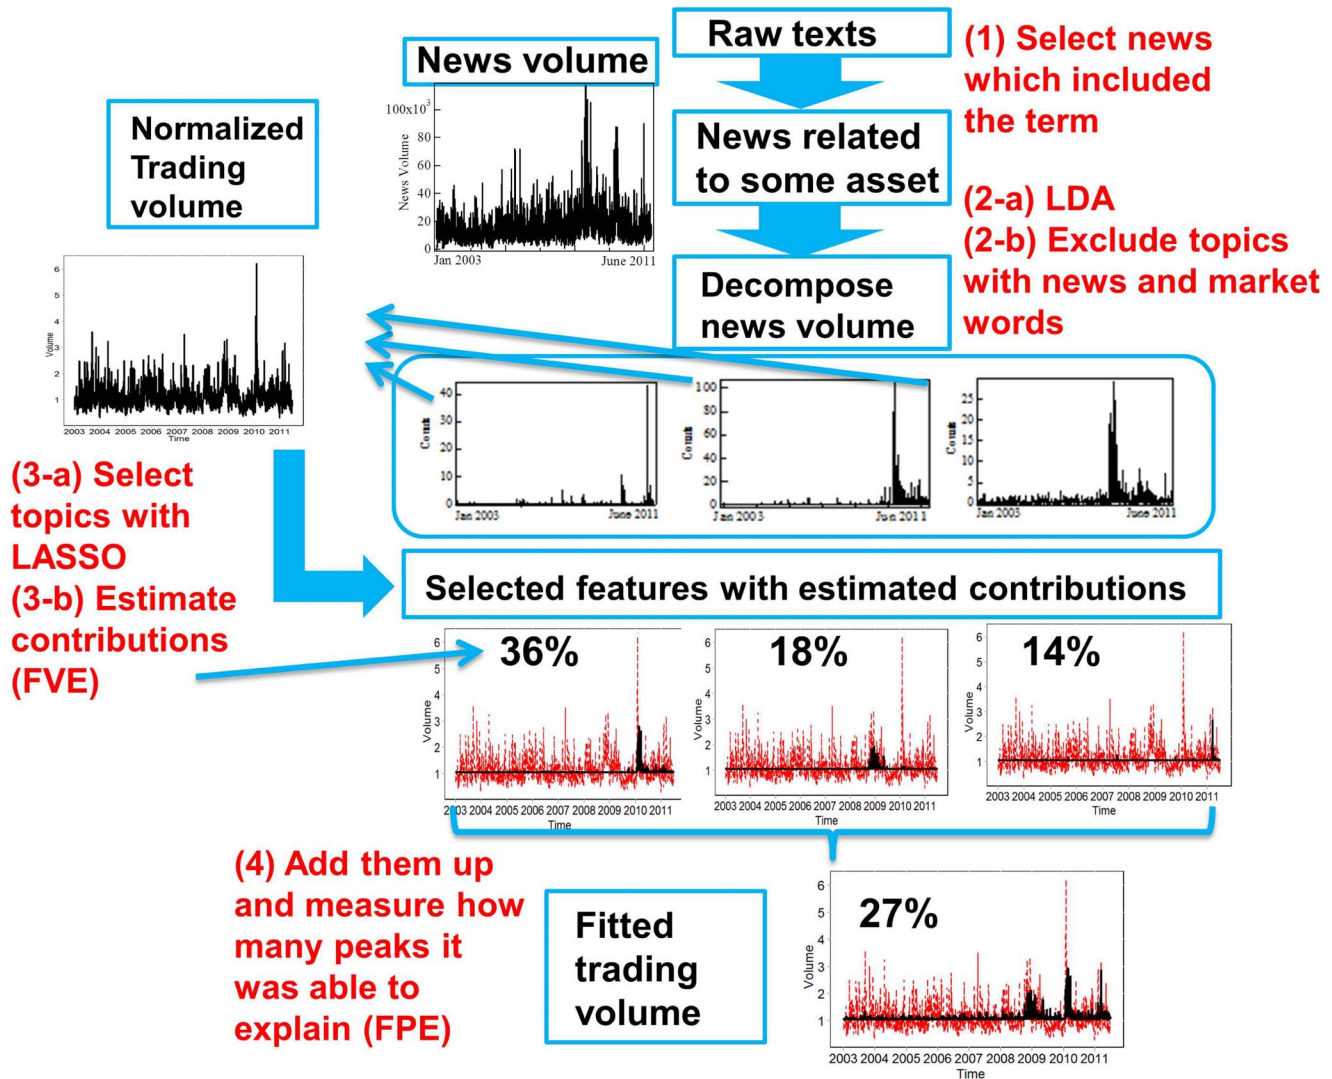

**Figure 2. Flowchart summarizing the procedure followed in our analyses.** The number in parentheses indexes the step. Step (1) selects the news records associated with a given term, here the name of a company, such as Toyota. Step (2-a) applies the Latent Dirichlet Allocation (LDA) that decomposes any document as a mixture of different topics. Step (3-a) implements a constrained LASSO regression. The percentage shown in step (3-b) denotes the estimated impact of each topic. The percentage shown in step (4) is the “fraction of (trading volume) peaks explained” (FPE) by news, which is our metric to assess the quality of our methodology (see text). doi:10.1371/journal.pone.0064846.g002

interpret. Since LDA has already yielded excellent results, we did not find it useful to employ more elaborate topic models. We removed common stop words from the original news records and ran LDA by setting the number of topics to 100 for all stocks analyzed in this article. Varying the number of topics according to the number of news records for each stock did not change the result significantly. We used the fast implementation of Smola and Narayanamurthy [24].

In what follows, we use the news volume  $I_k(t)$  of a given topic  $k$ , which is defined as the total number of words tagged with topic number  $k$  on day  $t$ ,

$$I_k(t) = \sum_{d \in I(t)} \sum_w N(d, w, k), \tag{1}$$

where  $N(d, w, k)$  is the number of times a word  $w$  tagged with topic  $k$  appeared in document  $d$  and  $I(t)$  is the indicator function of the set of documents on day  $t$ . Fig. 3 presents some examples of the time evolution of the news volume for four topics for the term “Toyota.” It also lists the top three words of the corresponding topic distributions. A full description is provided in the supporting information as long as their time series plot (i.e. Data. S1 and Fig. S1).

The fundamental characteristic of LDA (and of topic modeling in general) is that every word that appears in the corpus is tagged with a specific topic and is thus assumed to be generated by the corresponding specific topic distribution. Put differently, even though words in a given document can be generated by a mixture of topics, each word is assumed to be drawn from exactly one topic. This procedure makes the interpretation of the estimated topics easier to comprehend [25]. As highlighted by [26], this construction, however, has the following negative consequence: because news records, such as ours, have many repeated phrases

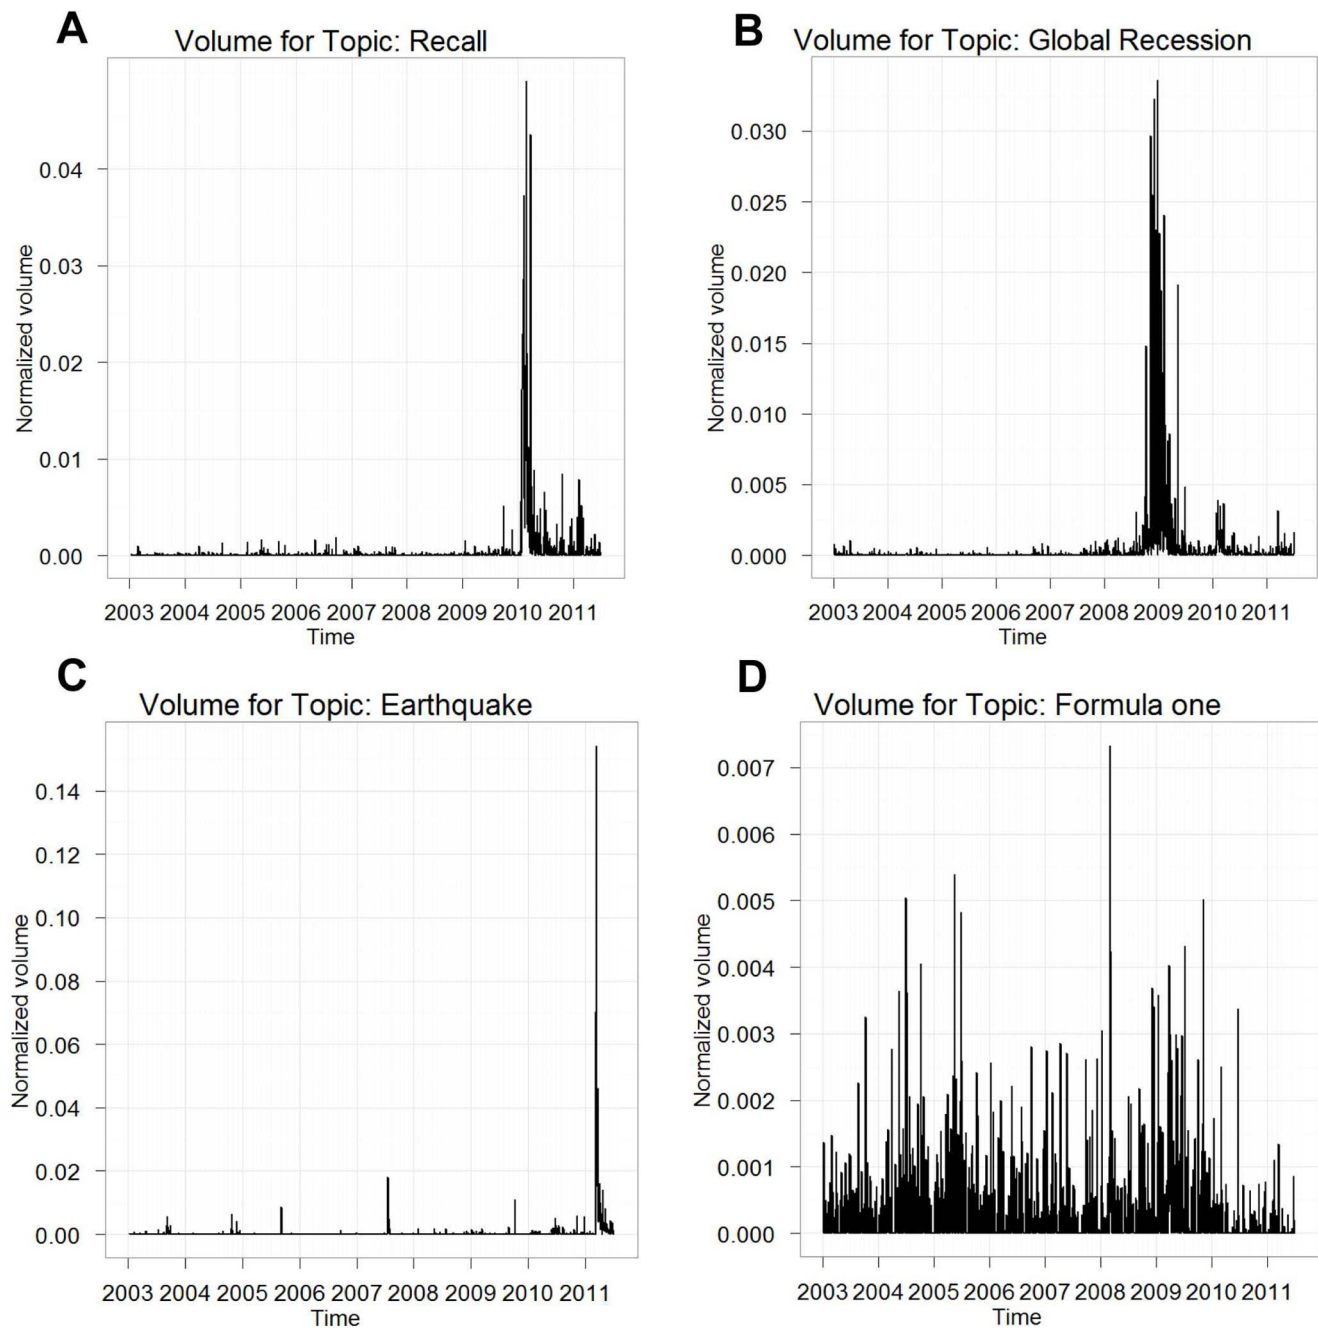

**Figure 3. Selected topic learned by LDA for Toyota.** Selected topics learned by LDA and the associated news volume estimated using equation (1) for the term "Toyota." The top three words for these topics were: (A) Toyota, recall, safety; (B) financial, crisis, economy; (C) Japan, production, earthquake; (D) team, F1, race.  
doi:10.1371/journal.pone.0064846.g003

such as "double click for more information," "Reuters messaging net," or "top news," many topic distributions simply reflect these repeated phrases. One way to deal with this problem is to eliminate these repeated phrases where they appear in the original corpus. However, because it is difficult to construct an algorithm that would work well for all the variations found in the huge amount of news records analyzed here, we chose to prune the topics using topic distributions, employing the following procedure. For each topic, we focused on the top 6 words of the corresponding topic distribution and eliminated that topic if these top 6 words were included in the set of words in the unwanted

repeated phrases (Step 2-b in Fig. 1). We also removed all topics that appear for less than 80 days (out of the 3103 days from January 2003 to June 2011). This excludes topics such as specific symbols and numbers reported in short time intervals. We also eliminated topics that describe stock market activity, i.e., which include words such as "hot," "stocks," "markets," as well as all sorts of currency name and so on, in order to focus on the underlying news information that is supposed to influence that stock. This procedure corresponds to filtering out the endogenous component underlying the information flow and price generating process. Thus, for "Toyota," for example, out of the original 100

**Table 1.** List of the 9 selected topics for “Toyota”.

| Rank | Top words                            | FVE  |
|------|--------------------------------------|------|
| 1    | (toyota,recall,safety)               | 0.36 |
| 2    | (financial,crisis,economy)           | 0.18 |
| 3    | (profit,yen,billion)                 | 0.15 |
| 4    | (japan,production,earthquake)        | 0.15 |
| 5    | (steel,percent,nippon,prices,demand) | 0.05 |
| 6    | (economy,japan,percent)              | 0.05 |
| 7    | (hybrid,cars,car)                    | 0.02 |
| 8    | (car,fiat,euro)                      | 0.01 |
| 9    | (pct,company,earnings)               | 0.01 |

Their estimated “fraction of volume explained” (FVE) are shown as well. Topic distributions are summarized with their top most frequent 3–5 words. For a full description of the topic distributions, see the supporting information.  
doi:10.1371/journal.pone.0064846.t001

topics, we are left with 26 useful topics to work with that are associated with the term.

The relative importance of each topic in explaining trading volume of a given stock is determined by a simple LASSO regression [27–29] with positive constraints:

$$Vol(t) = \sum_{k=1}^K w_k I_k(t) + \epsilon(t), \quad (2)$$

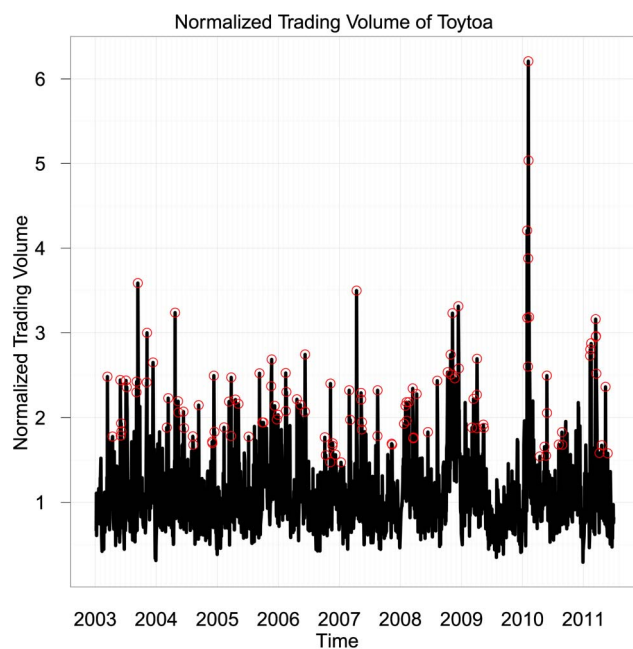

**Figure 4. Pictorial illustration of “peak days” of normalized trading volume.** The black line shows the de-trended trading volume of Toyota stock for the period from January 2003 to June 2011. The red dots indicate the “peak days” selected by the method described in the text. There are 119 “peak days” for the entire period from January 2003 to June 2011.  
doi:10.1371/journal.pone.0064846.g004

where  $Vol(t)$  is the normalized trading volume at time  $t$ . Normalization of the trading volume is performed by dividing volume by the median trading volume within a 2 year moving window (boundary values are set to the nearest non-zero value). The regularized linear regression with mean-squared error provides a robust estimation of the relationship between news topics and trading volume in the presence of large bursts of trading activity and news, so that a larger span of activity sizes can contribute to the determination of the regression weights  $\{w_k\}$ . The regularization parameter used in the LASSO regression was chosen equal to the mean value of the regularization parameter over one hundred ten-fold cross validations. Ten-fold cross validation was performed by randomly dividing the entire data set into ten subsets and measuring the average mean-squared error of each testing set from the ten-fold cross validation. This procedure was performed multiple times to ensure stability of the estimated regularization parameter.

Because researchers are generally interested in explaining large (or “abnormal”) market activity, we focus our attention on “peak days,” defined in terms of the 95th percentile of daily trading volume, so that on 95% of the days the trading volume was smaller than during the peak days. In order to pay equal attention to large market activity across the whole study period (January 2003 to June 2011), we divided the period overall into 17 six-month time windows and identified the “peak days” for each of the 17 time windows separately. The sequence of peak days is shown in Fig. 4. For each term such as “Toyota,” the fraction of the corresponding estimated news volume that can be explained by each topic via regression (2), restricting our attention to only the news volume found on “peak days,” is referred to as the “fraction of volume explained” (FVE). In this article, we only use topics that obtained FVE values larger than 0.5%. For example, this method determines  $K=9$  out of 26 topics as being useful for “Toyota.” Table 1 provides a list of these 9 topics and their individual FVEs for “Toyota.” Inspections of this list shows that our procedure yields sensible results, and unimportant topics such as “Formula One” shown in Fig. 3 are correctly pruned out.

FIG. 5 compares the observed trading volume with the fitted trading volume using regression (2) (without the residual term  $\epsilon(t)$ ) for four stocks: Toyota, Yahoo, Best Buy, and BP. While some parts exhibit a good match, other parts show some discrepancy. To quantify the quality of the regression and explanatory power of the topic decomposition, we focus on the “peak days” previously defined and shown in Fig. 4. We define a success if the predicted volume is at least equal to 10% of the observed trading volume for a given peak day subtracting the constant value estimated via regression. The fraction of peak days among the total number peak days over the entire period from January 2003 to June 2011 whose volume is successfully accounted for in this sense is referred to as the “fraction of peaks explained” (FPE). We obtain the following values: FPE = 0.27 (the total number of explained peak days is 32 out of 119) for Toyota, FPE = 0.70 (the total number of explained peak days is 83) for Yahoo, FPE = 0.51 (the total number of explained peak days is 61) for Best Buy, and FPE = 0.43 (the total number of explained peak days is 51) for BP.

The quality of our regression exercise can be further assessed by comparing the results with those obtained using reference nulls. Specifically, we swap the news associated with different companies. For example, we use the news records associated with BP and use the extracted topics in regression (2) in order to explain the trading volume of Yahoo (left panel of Fig. 6) and use the news record associated with Yahoo to explain the trading volume of Best Buy (right panel of Fig. 6). This corresponds to modifying only step (1) in the flowchart shown in Fig. 2, while all the other

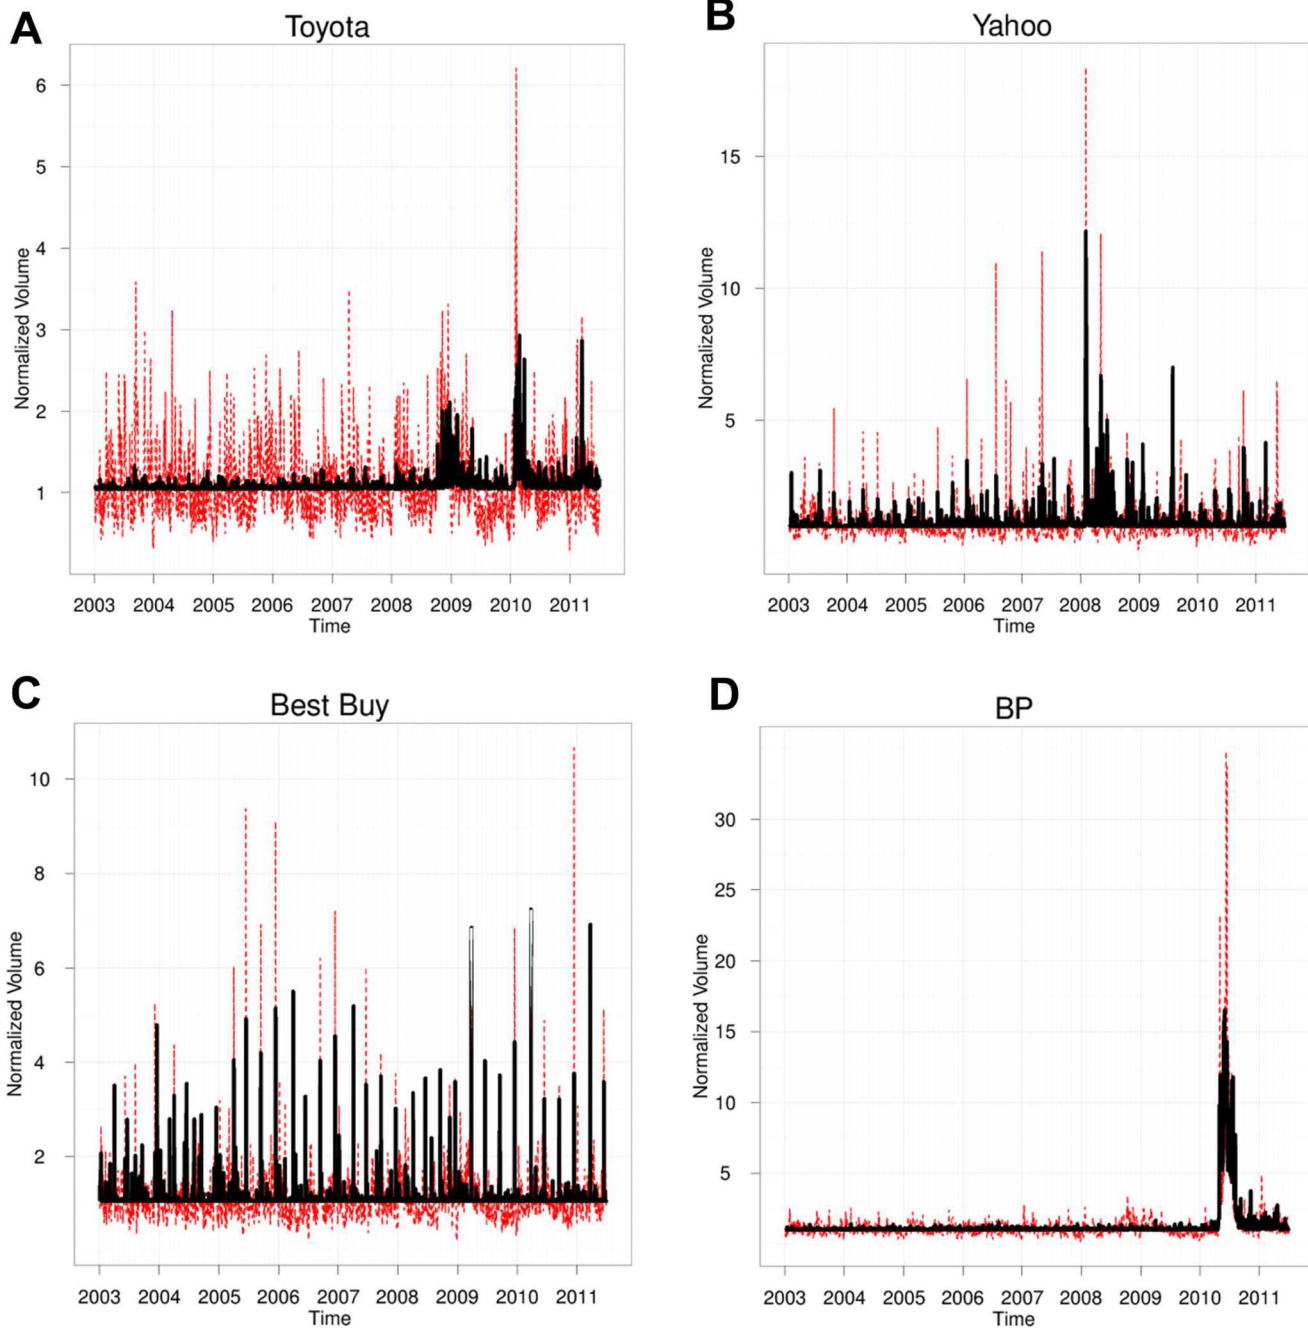

**Figure 5. Comparison between estimated and actual trading volume.** Estimated (red dashed line) and actual (black continuous line) trading volume for the four companies: (A) Toyota, (B) Yahoo, (C) Best Buy, and (D) BP. The number  $K$  of sufficient selected topics is 9 for Toyota, 4 for Yahoo, 3 for Best Buy, and 5 for BP. doi:10.1371/journal.pone.0064846.g005

steps remain the same. As seen in Fig. 6 the explanatory power decreases considerably, as for instance illustrated by the fact that the FPE is exactly 0 in both cases. This substantial decrease in explanatory power is found in all our tests and confirms that our regressions done at the daily scale perform well in pruning out unimportant topics and identify the relevant ones. Obviously, (i) if the two companies for which news records are swapped have some commonalities (e.g., they are engaged in merger talks), or (ii) if they always disclose their earnings reports on exactly the same date throughout the entire observation period, then some topics found

for one stock would explain the trading activity of the other, but this is rarely the case.

## Results

We applied the methodology introduced in the previous section to the 206 companies listed in the S&P 500 US stock index for which there were more than 5,000 news records during the period from January 2003 to June 2011. Fig. 7 plots the FPE metric as a function of the number of news records for these 206 stocks.

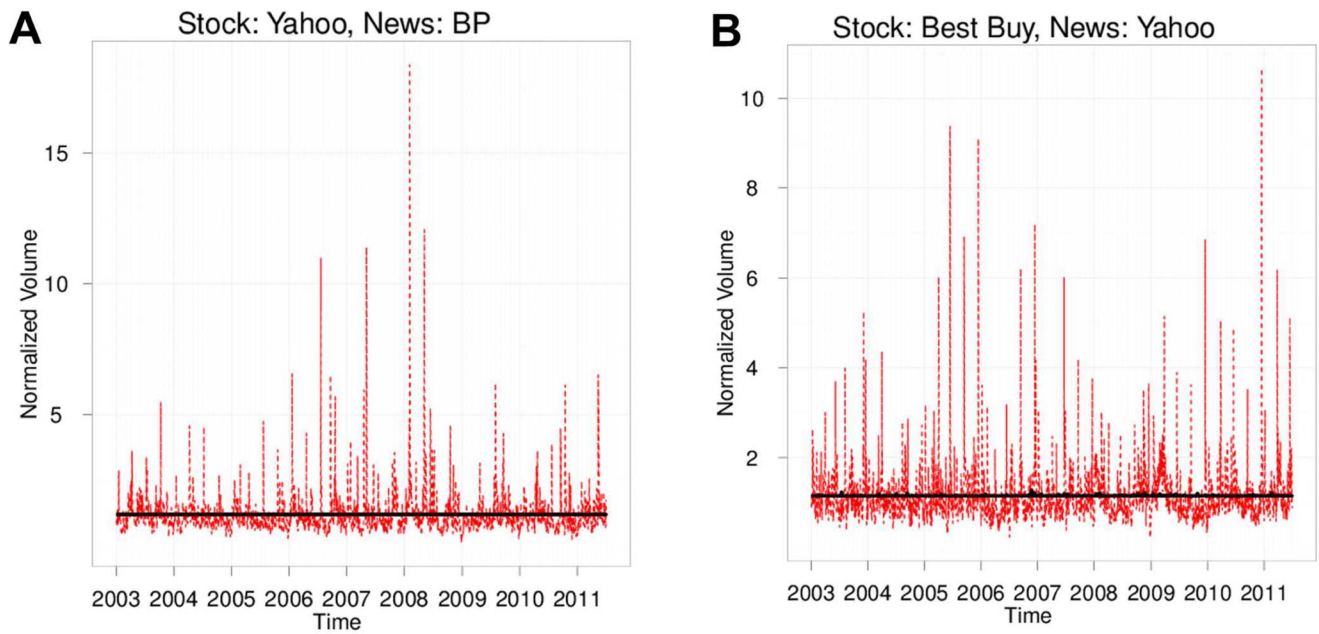

**Figure 6. Result of stress testing.** (A) Comparison between the estimated and actual trading volume when using topics from BP when trying to explain Yahoo trading volume. (B) Comparison when using topics from Yahoo when trying to explain Best Buy trading volume. Notice the much reduced quality of the regressions compared with those presented in Fig. 6, illustrated by their FPEs, which are exactly 0 in both cases. doi:10.1371/journal.pone.0064846.g006

Over the set of the 206 analyzed US stocks, 715 topics were found to have a significant impact on trading activity. Recalling

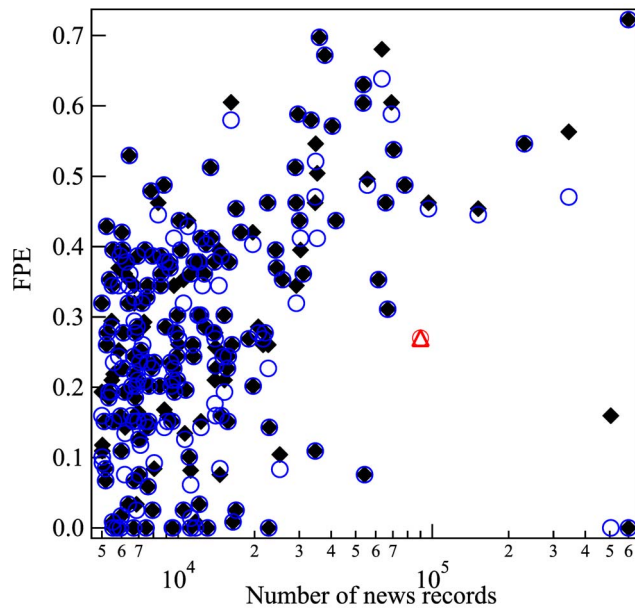

**Figure 7. Relationship between FPE and number of news records.** The “fraction of peaks explained” (FPE) as a function of the number of news records for the 206 stocks in the S&P 500 for which there were more than 5,000 news records during the period from January 2003 to June 2011. Black diamond shows the FPE value using the 715 topics extracted from our procedure. Blue circle shows the FPE value restricting the number of topic distributions to 637 after manual reading. The data point for Toyota, which as a foreign company of course is not a component of the S&P 500, has been added and is shown as the red triangle and circle. doi:10.1371/journal.pone.0064846.g007

that the logic of topic models, as highlighted by [23], is that corpus meanings are organized in topics that share global multinomial word distributions, a convenient way to visualize the similarities between topics is to use network graphs. We therefore construct networks with topics as nodes, and a link between two topics exists when the Jensen-Shannon Divergence (JSD) [30] between the two corresponding topic distributions is smaller than 0.5. The size of a node is set to be proportional to the “fraction of volume explained” (FVE) by that topic and the thickness of a link is equal to 1 minus the JSD metric for the two linked topics. Each topic is labeled by its top three most frequent words, as quantified by the topic distribution, together with the company’s name. We also depict all the companies name with a fixed size of 0.5 and connected all their selected topics with them where the edge strength was set to their FVE value. The networks are depicted using the Force Atlas algorithm using the freely available software Gephi(<https://gephi.org/>).

Fig. 8 shows the network of topics for the two stocks Microsoft and Yahoo. Both have topics reflecting earning reports and exhibit features that reflect a potential merger deal. From the node sizes (proportional to their FVEs), one can clearly see that the potential merger deal between the two companies had more impact on Yahoo’s stock than on Microsoft’s stock. This is in agreement with the fact that Yahoo was facing difficulties in 2009. This demonstrates another useful property of our method, which is that it allows us to quantify and compare the impact of two or more external influences.

Fig. 9 shows the whole network of all the topics extracted by our method for the 206 stocks we focus on. The network can be viewed as consisting of the “mainland” and more isolated “islands.” The mainland is made up of all the connections between topics produced by words reflecting earnings reports (“profit,” “earn- ing,” “share,” “pct (short for percent)”, credit ratings (“rating,” “debt,” “credit”), merger deal (“merger,” “deal”), and the financial crisis (“crisis,” “financial”). In order to better discern some of the major “islands,” Fig. 10 presents six zooms on the

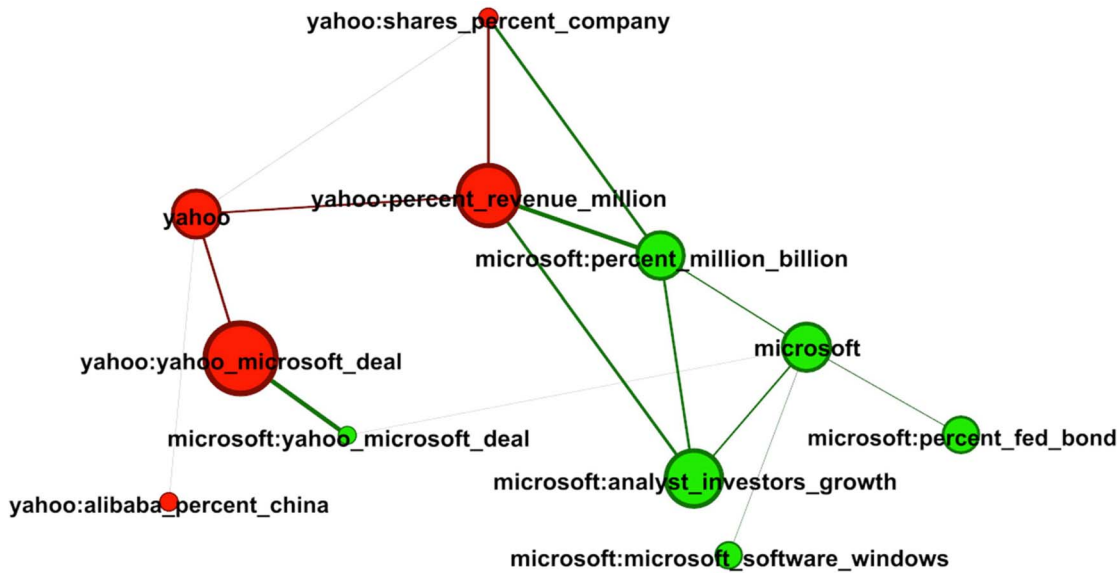

**Figure 8. Network extracted for Microsoft and Yahoo.** Nodes are topics and links between two topics quantify the degree of similarity associated with their word distributions. doi:10.1371/journal.pone.0064846.g008

domains indicated by the arrows in Fig. 9. The observed clusters of company names and words representing the topic distributions confirm that our method successfully extracted the correct information. Note that all the word contents of the constructed topic distributions have financial and/or economic meaning that carry useful information from the point of view of an investor and

can be surmised to indeed have an impact on the future earning of the firms. We refer in particular to the following word contents: “earning reports,” “retailers profits,” “drug patents,” “national defense budget,” “new products,” “merger deal,” “global recession,” “natural disasters,” and so on.

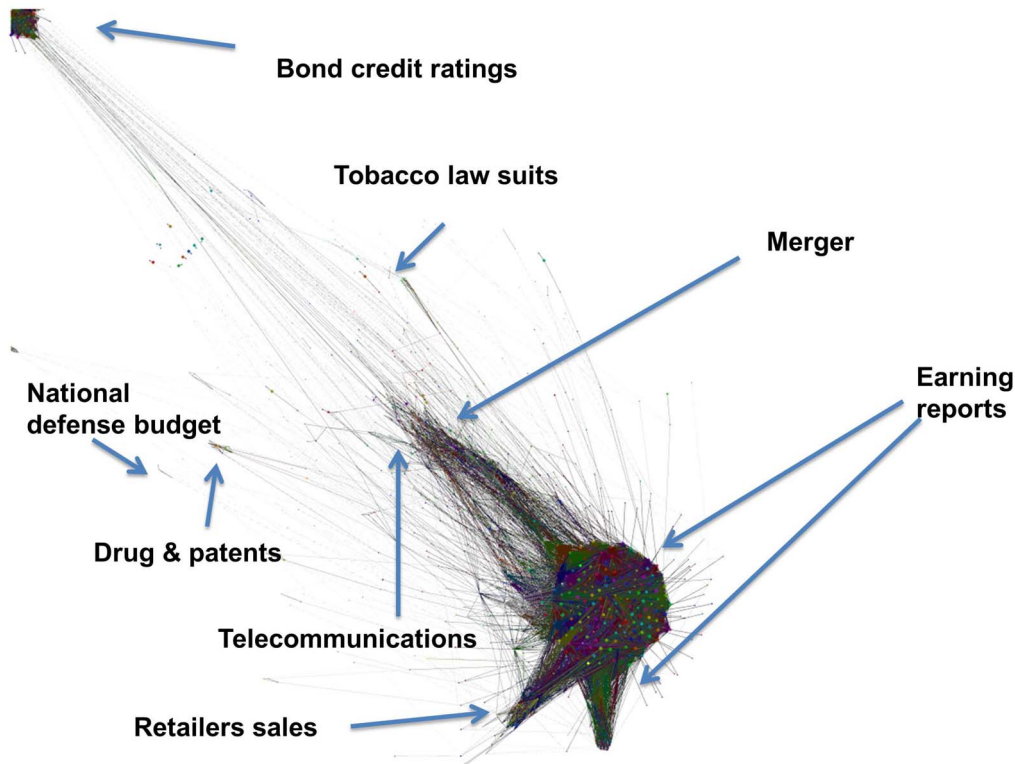

**Figure 9. Network of topics extracted for the 206 US companies.** The links between two topics quantifying the degree of similarity associated with their word distributions, as explained in the text. The six red arrows depict the zones that are magnified in Fig. 10. doi:10.1371/journal.pone.0064846.g009



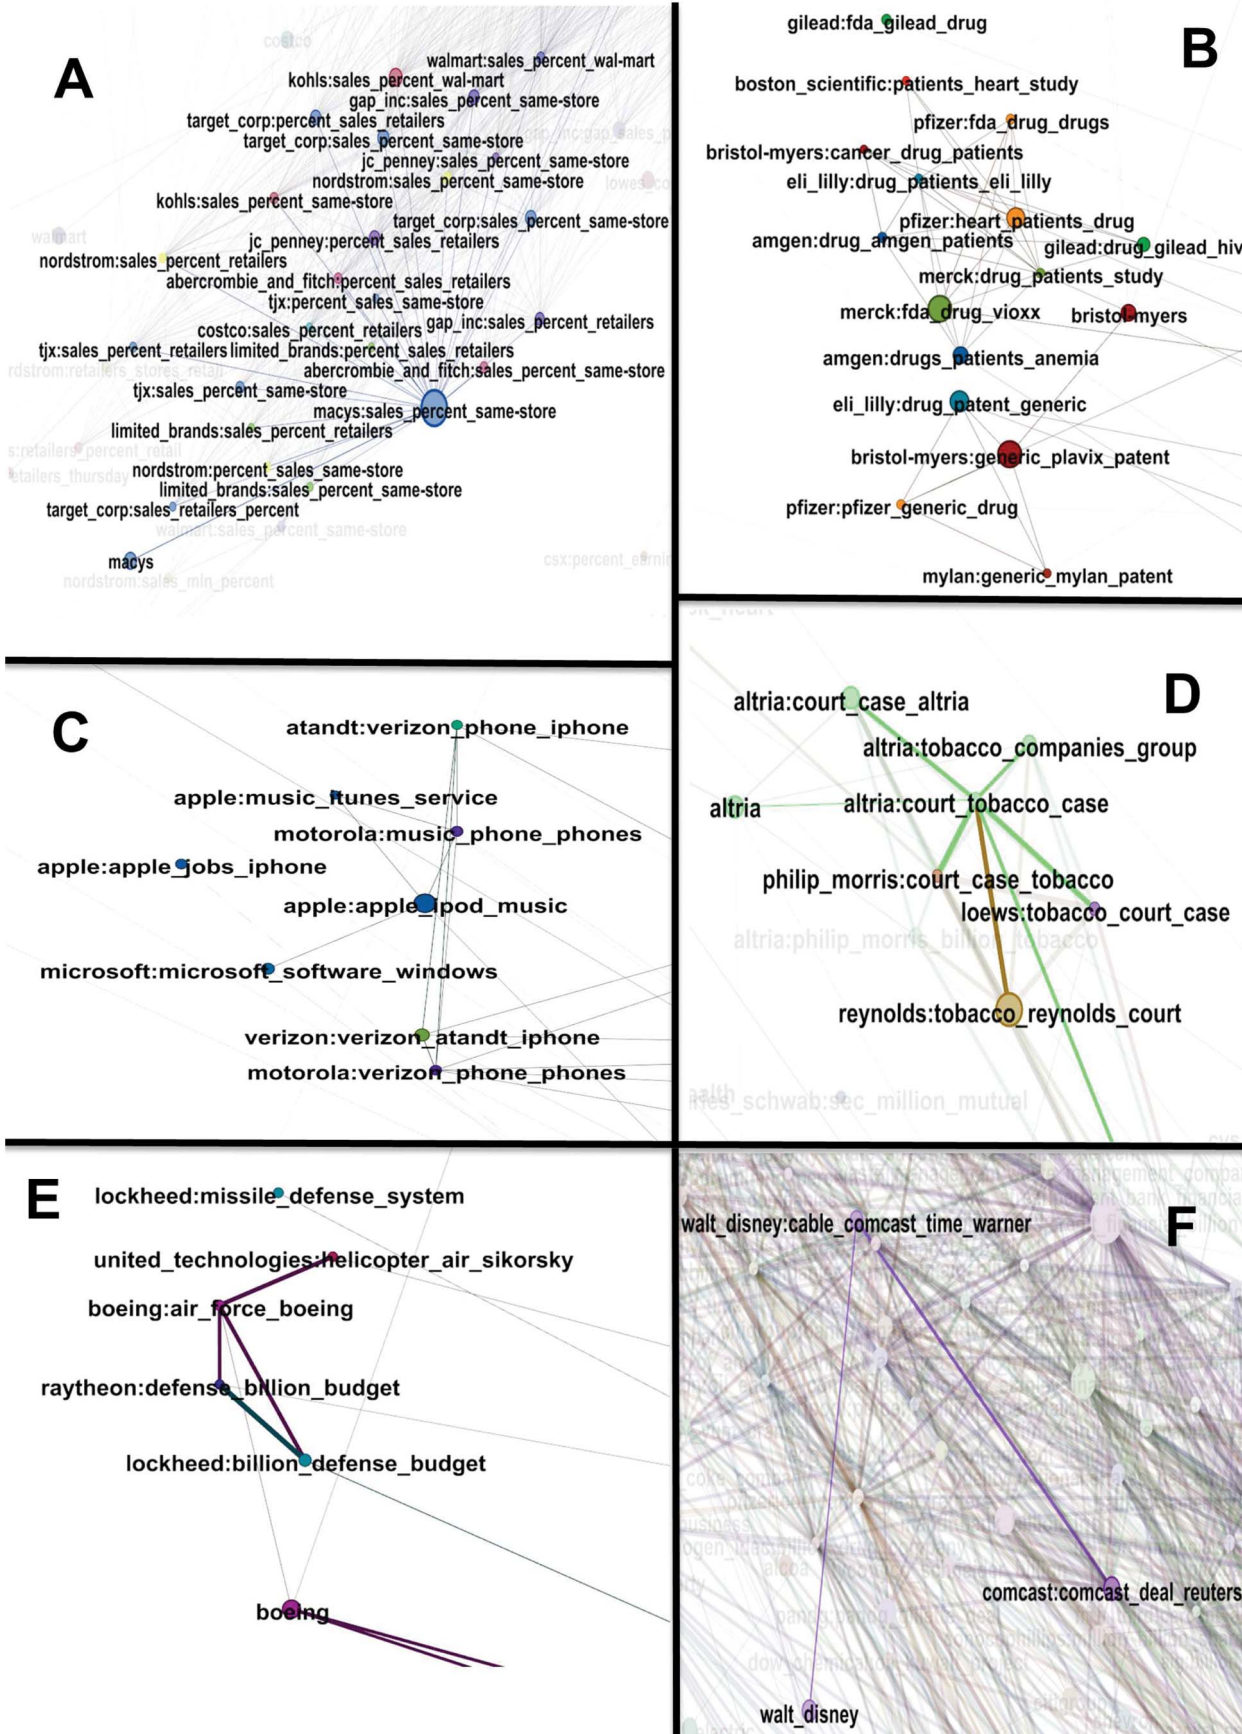

**Figure 10. Magnifications of Figure 9.** Six magnifications of the “islands” indicated by the arrows in the network of topics shown in Fig. 10, with links between two topics quantifying the degree of similarity associated with their word distributions. Each node is accompanied by the name of the company and its top three most frequent words, as quantified by the topic distribution. The size of a node is set to be proportional to the “fraction of

volume explained" (FVE) by that topic and the thickness of a link is equal to 1 minus the JSD metric for the two linked topics. Panel (a) shows the network associated with retail sales of clothing companies; panel (b) that associated with drug and patents; panel (c) that associated with products in telecommunication business; panel (d) that associated with tobacco law suit; panel (e) that associated with national defense budget; panel (f) that associated with the potential Comcast Disney merger in 2004.  
doi:10.1371/journal.pone.0064846.g010

**Table 2.** Table summarizing the content of our extracted topics.

| Number | Classification                                     | Number of stocks |
|--------|----------------------------------------------------|------------------|
| 1      | Quarterly earnings                                 | 187              |
| 2      | Bond credit ratings                                | 57               |
| 3      | Merger and acquisition                             | 41               |
| 4      | Sales (revenue) of products (stores)               | 25               |
| 5      | Lawsuit                                            | 17               |
| 6      | Financial crisis                                   | 17               |
| 7      | Top management(board/gossip)                       | 16               |
| 8      | Product information                                | 15               |
| 9      | Drugs(patents/controversy/approval)                | 12               |
| 10     | Business deal                                      | 10               |
| 11     | Corporate bond                                     | 8                |
| 12     | Flawed accounting/Insider trading/Late trading/SEC | 8                |
| 13     | Recall                                             | 6                |
| 14     | Bankruptcy (of other firms)                        | 6                |
| 15     | Shortlist/Takeover/Selling own stocks              | 5                |
| 16     | Energy prices                                      | 5                |
| 17     | Legislation/Regulation/Bill                        | 4                |
| 18     | Natural disaster                                   | 4                |
| 19     | BP oil spill                                       | 4                |
| 20     | National defense                                   | 3                |
| 21     | Strike                                             | 3                |
| 22     | Outbreak                                           | 3                |
| 23     | Medical industry                                   | 3                |
| 24     | Central America economy                            | 3                |
| 25     | Dividend                                           | 2                |
| 26     | Licensing (airwaves/licensing in middle east)      | 2                |
| 27     | Lay off                                            | 2                |
| 28     | Power plant                                        | 2                |
| 29     | Oil refinery                                       | 2                |
| 30     | Building pipeline                                  | 2                |
| 31     | Precious metal                                     | 2                |
| 32     | Media industry                                     | 2                |
| 33     | Fast food industry                                 | 2                |
| 34     | India economy                                      | 2                |
| 35     | IPO (of related firms)                             | 1                |
| 36     | Business plan                                      | 1                |
| 37     | Blackout                                           | 1                |
| 38     | Subprime loan problem                              | 1                |
| 39     | Government bailout                                 | 1                |
| 40     | Gas                                                | 1                |
| 41     | Environmental issue                                | 1                |
| 42     | Steel                                              | 1                |
| 43     | Online education business                          | 1                |
| 44     | Middle east economy                                | 1                |

The classification was created by manual reading of the underlying news records that included the topic, at least to some extent. The right column shows the number of stocks that contained that topic out of the 206 analyzed stocks. See text for more information.  
doi:10.1371/journal.pone.0064846.t002

To assess further the quality of our regressions, we manually “read” all the 715 topic distributions, identifying the underlying news records that contained each topic to some extent. As could be suspected given our approach, not all topics qualified as conveying meaningful information: among the 715 topic distributions, we determined that 78 were misspecified. Those topics were either (1) reflecting news words that were not correctly pruned out by our procedure (such as “reuters,” “users,” “click”), (2) market words that were not correctly pruned out (“imbalance,” “nyse,” “trademark”), or (3) incorrect information extracted due to the peculiarity of our data that one news record sometimes contains more than one piece of information news (for instance, this is due to news records that list the top news of the day). To determine the impact of excluding these misspecified topics, blue circles in Fig. 7 show the FPE value excluding these misspecified topics. We see that the overall FPE value does not change much, supporting our trust in the robustness of our approach.

The other 89% (i.e. 637) topic distribution contained relevant information. To classify these remaining topics, we first combined duplicated topics for each stock (for instance, the third and ninth topic in table 1 both reflect earnings reports). This leads to 44 broad categories, which are listed in Table 2. Our method tends to put more emphasis on regular reporting about the future earning of the firms, but also successfully extracts peculiar incidents that are suspected to change the course of the future earnings of the firms. Summing up all these investigations, we conclude that we have successfully extracted the important pieces of information that influence financial markets.

## Discussion

In this study, we performed an analysis of more than 24 million news records provided by Thompson Reuters and of their relationship with trading activity of the stock of 206 major firms included in the S&P 500 index. We showed that the whole landscape of the news that affect stock price movements can be automatically summarized by conducting a simple regularized regression between trading activity and news information pieces decomposed into their “thematic” features, with the help of simple topic modeling techniques. Using these methods, not only were we able to extract the pieces of information that synchronize well with trading activity but, as a bonus of the simultaneous regressions, we were also able to estimate and quantify their impact, which is difficult to do otherwise. We also introduced novel ways to visualize the whole landscape of news information associated with a basket of stocks by utilizing network visualization techniques. The examination of the words that are representative of the topic distributions and careful reading of the news records which included that topic to some extent confirmed that our method successfully extracted the significant pieces of information influencing the stock market.

## References

- Cutler D, Poterba J, Summers L (1989) What moves stock prices? *Journal of Portfolio Management* 15: 4–12.
- McQueen G, Roley VV (1993) Stock prices, news, and business conditions. *Review of Financial Studies* 6(3): 683–707.
- Fleming MJ, Remolona EM (1997) What moves the bond market. *Journal of Portfolio Management* : 28–38.
- Fair R (2002) Events that shook the market. *Journal of Business* 75(4): 713–731.
- Joulin A, Lefevre A, Grunberg D, Bouchaud JP (2008) Stock price jumps: news and volume play a minor role. *Wilmott Magazine* Sep/Oct: 46.
- Erdogan O, Yezge A (2009) The news of no news in stock markets. *Quantitative Finance* 9(8): 897–909.
- Shiller R (1981) Do stock prices move too much to be justified by subsequent changes in dividends? *American Economic Review* 71: 421–436.
- LeRoy S, Porter R (1981) The present-value relation: Tests based on implied variance bounds. *Econometrica* : 555–574.
- LeRoy SF (2008) Excess volatility tests. In: Durlauf SN, Blume LE, editors, *The New Palgrave Dictionary of Economics*, Basingstoke: Palgrave Macmillan.
- Soros G (1994) *The Alchemy of Finance: Reading the Mind of the Market*. Wiley Audio, Wiley.
- Filimonov V, Sornette D (2012) Quantifying reflexivity in financial markets: Toward a prediction of flash crashes. *Physical Review E* 85(5): 056108.
- Reinhart CM, Rogoff K (2009) *This Time Is Different: Eight Centuries of Financial Folly*. Princeton University Press, 1st edition edition.
- Zhi D, Engelberg J, Gao P (2011) In search of attention. *The Journal of Finance* LXVI: No.5.
- Dellavigna S, Pollet J (2011) Investor inattention and friday earnings announcements. *The Journal of Finance* 64(2): 709–749.

Our finding of a high explanatory power of news to account for stock market trading activity provides insights on the question raised in the introduction on the nature of the news that may influence stock markets and how they are digested in stock prices. In particular, our results show that large volumes of trading can often be explained by the flow of news. In this sense, our results might suggest that “excess trading” is not always prevalent, especially when the news are genuinely novel and provide relevant financial information.

One of the reasons for the success of our simple methodology, which does not require taking into account lag effects or more sophisticated nonlinear dynamics, is probably the high quality of the news sources, which resulted in a high signal-over-noise ratio. Specifically, the news that we used are gathered for professional investors, who incentivize the collecting firm by paying significant subscription fees. Our study confirms the exceptional relevance of such professional financial sources compared with other standard textual information such as tweets or blogs. The size of our database in terms of the number of news records compared with that available from standard newspapers was also essential for the extraction of the important topics that influence the trading activity of financial markets. In conclusion, we believe that our results summarize the major sources of external influences on financial markets stemming from news information associated with them. Another challenge beyond explaining trading activity is to explain pricing and financial valuations in general, using the extended universe of news, topics, and their networks. This is left for future work.

## Supporting Information

**Figure S1 Time evolution of news volume for all the learned topics for “Toyota”.** Horizontal axis denotes days (Jan 2003 to June 2011) and vertical axis shows their unnormalized volume.

(TIF)

**Data S1 Exact pruning procedure and full description of all the topic distributions for the term “Toyota”.**

(PDF)

## Acknowledgments

The authors are grateful to Vladimir Filimonov, Georges Harras, and Ryan Woodard for helpful discussions and comments concerning this work.

## Author Contributions

Conceived and designed the experiments: RH DS TM TO TW. Performed the experiments: RH. Analyzed the data: RH. Contributed reagents/materials/analysis tools: RH. Wrote the paper: RH DS TW. Provided the data: TW.

15. Engelberg J, Parsons C (2011) The causal impact of media in financial markets. *The Journal of Finance* 66(1): 67–97.
16. Tetlock P (2007) Giving content to investor sentiment: The role of media in the stock market. *The Journal of Finance* 62: 1139–1168.
17. Bollen J, Mao H, Zeng X (2011) Twitter mood predicts the stock market. *Journal of Computational Science* 2: 1–8.
18. Gurun U, Butler A (2012) Don't believe the hype: Local media slant, local advertising, and firm value. *The Journal of Finance* 67(2): 561–598.
19. Ito T, Roley V (1987) News from the u.s. and japan which moves the yen/dollar exchange rate? *Journal of Monetary Economics* 19: 255–277.
20. Mizuno T, Takei K, Ohnishi T, Watanabe T (2012) Temporal and cross correlations in business news. *Progress of Theoretical Physics Supplement* 194: 181–192.
21. Blei D, Ng A, Jordan M (2003) Latent dirichlet allocation. *Journal of Machine Learning Research* 3: 993–1022.
22. Griffiths T, Steyvers M (2004) Finding scientific topics. *PNAS* 101: 5228–5235.
23. Koller D, Friedman N (2009) *Probabilistic Graphical Models: Principles and Techniques*. MIT Press.
24. Smola A, Narayanamurthy S (2010) An architecture for parallel topic models. *Proceedings of the VLDB Endowment* 3(1).
25. Hinton G, Salakhutdinov R (2010) Discovering binary codes for documents by learning deep generative models. *Topics in Cognitive Science* : 1–18.
26. Mimno D, Blei D (2011) Bayesian checking for topic models. *Empirical Methods in Natural Language Processing*.
27. Tibshirani R (1996) Regression shrinkage and selection via the lasso. *J Royal Statist Soc B* 58(1): 267–288.
28. Hastie T, Tibshirani R, Friedman J (2008) *The elements of statistical learning: data mining, inference and prediction*. Springer, 2 edition.
29. Goeman J (2010) C<sub>1</sub>-penalized estimation in the cox proportional hazards model. *Biometrical Journal* 52(1): 70–84.
30. Endres D, Schindelin J (2003) A new metric for probability distributions. *IEEE Trans Inf Theory* 49(7): 1858–1860.
